# Supplementary material for: An efficient strategy with a synergistic effect of hydrophilic and electrostatic interactions for simultaneous enrichment of N- and O-glycopeptides
Source: Royal Society of Chemistry journal article supplement (doi:10.1039/d3an01888a), 2023-12-09
Supplement: d3an01888a1.pdf [file d3an01888a1.pdf]

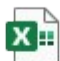

Electronic  
Supplementary in

**Explanation:** Due to the inability to fully display all the information from the " Electronic Supplementary information\_2.xlsx " file in the generated PDF, the file has been encrypted and uploaded to the GitHub website to facilitate Editors and Reviewers in accessing the information listed in the Table. The detailed website, file name, and password are as follows:

**Website:** <https://github.com/nbugaowenqing/Supporting-information.git>

**File name:** Electronic Supplementary information\_2.xlsx

**Password:** SI20231031
