# Supplementary material for: An efficient strategy with a synergistic effect of hydrophilic and electrostatic interactions for simultaneous enrichment of N- and O-glycopeptides
Source: Royal Society of Chemistry journal article supplement (doi:10.1039/d3an01888a), 2023-12-09
Supplement: d3an01888a2.pdf [file d3an01888a2.pdf]

## Electronic Supplementary Information

### **An efficient strategy with synergistic effect of hydrophilic and electrostatic interactions for simultaneous enrichment of N- and O-glycopeptides**

Zhonghan Hu<sup>a,b</sup>, Wenqing Gao<sup>a,b,\*</sup>, Rong Liu<sup>a,b</sup>, Jiaqian Yang<sup>a,b</sup>, Renlu Han<sup>a,b</sup>, Junhui Li<sup>a,b</sup>, Jiancheng Yu<sup>a,b,c</sup>, Danhua Ma<sup>d\*</sup>, Keqi Tang<sup>a,b,\*</sup>

<sup>a</sup> *Institute of Mass Spectrometry, Zhejiang Engineering Research Center of Advanced Mass spectrometry and Clinical Application, School of Material Science and Chemical Engineering, Ningbo University, Ningbo, 315211, PR China*

<sup>b</sup> *Zhenhai Institute of Mass Spectrometry, Ningbo, 315211, PR China*

<sup>c</sup> *Faculty of Electrical Engineering and Computer Science, Ningbo University, Ningbo, 315211, PR China*

<sup>d</sup> *Department of Stomatology, Ningbo No.2 Hospital, Ningbo, 315010, PR China*

*\*Corresponding author(s)*

*E-mail(s): gaowenqing@nbu.edu.cn; mdh7639@163.com; tangkeqi@nbu.edu.cn*

---

## Table of contents

---

### Experiment details

|                                                                                 |    |
|---------------------------------------------------------------------------------|----|
| Characterization of PDA-ADE@KCP.                                                | S1 |
| Examination of PDA-ADE@KCP glycopeptide enrichment selectivity and sensitivity. | S2 |

### Supporting figures

|                                                                                                                                                        |          |
|--------------------------------------------------------------------------------------------------------------------------------------------------------|----------|
| XPS wide-scan spectra of KCP, PDA@KCP and PDA-ADE@KCP.                                                                                                 | Fig. S1  |
| EDS spectra of KCP, PDA@KCP and PDA-ADE@KCP.                                                                                                           | Fig. S2  |
| The narrow-scan XPS spectra of KCP, PDA@KCP and PDA-ADE@KCP.                                                                                           | Fig. S3  |
| Comparison of the peak intensities associated with C=O and C-N in the C1s spectra.                                                                     | Fig. S4  |
| PDA-ADE@KCP glycopeptide enrichment performance with standard glycoproteins. MALDI-TOF MS spectra of IgG tryptic digests.                              | Fig. S5  |
| PDA-ADE@KCP storage stability.                                                                                                                         | Fig. S6  |
| The number of identified N- and O-glycoproteins, glycosites, intact glycopeptides and glycans using commercial ZIC-HILIC.                              | Fig. S7  |
| The number of identified N- and O- linked intact glycopeptides, glycosites, glycoproteins compared between PDA-ADE@KCP and ZIC-HILIC from mouse liver. | Fig. S8  |
| Functional annotation analysis of global O-glycoproteins in mouse liver.                                                                               | Fig. S9  |
| Functional annotation analysis of global N-glycoproteins in mouse liver.                                                                               | Fig. S10 |

### Supporting tables

|                                                                                                                                              |          |
|----------------------------------------------------------------------------------------------------------------------------------------------|----------|
| Chemical compositions (by XPS) of KCP, PDA@KCP and PDA-ADE@KCP.                                                                              | Table S1 |
| Detailed information of the observed glycopeptides obtained from IgG tryptic digests after enrichment by PDA-ADE@KCP.                        | Table S2 |
| Unique intact glycopeptides detected in mouse liver after PDA-ADE@KCP enrichment with PEP2D<0.01, FDR 2D<0.01 and  Log Prob  ≥ 2 as cut off. | Table S3 |

---

---

|                                                                                                                                                 |          |
|-------------------------------------------------------------------------------------------------------------------------------------------------|----------|
| Unique intact glycopeptides detected in mouse liver after ZIC-HILIC enrichment with PEP2D<0.01, FDR 2D<0.01 and  Log Prob  $\geq$ 2 as cut off. | Table S4 |
| Unique intact glycopeptides detected in mouse liver after PDA-ADE@KCP enrichment with Score>500 as cut off.                                     | Table S5 |
| Unique intact glycopeptides detected in mouse liver after ZIC-HILIC enrichment with Score>500 as cut off.                                       | Table S6 |
| Glycoproteins captured by PDA-ADE@KCP in mouse liver.                                                                                           | Table S7 |
| Glycopeptides with both N- and O-glycan modifications in mouse liver.                                                                           | Table S8 |

---

### **S1 Characterization of PDA-ADE@KCP.**

The particle properties of PDA-ADE@KCP were assessed through various techniques. The morphology was inspected with scanning electron microscopy (Zeiss, Germany), while the elemental composition was determined using EDX X-Max (Oxford Instrument, UK). The surface functional groups were identified using Nicolet Fourier Transformed Infrared (FTIR) spectroscopy (Thermo Scientific, USA), and the absorbance was scanned from 450 to 4000  $\text{cm}^{-1}$ . Zeta potential ( $\zeta$ ) measurements were taken with Malvern Zetasizer Nano ZS90 (Worcestershire, UK), particles were dispersed in water, and the data was analyzed with Zetasizer Software 7.01. A K-Alpha X-ray photoelectron spectroscopy (XPS) spectrometer (Thermo Scientific, USA) was used to detect the chemical composition of samples at  $2 \times 10^{-7}$  mbar pressure. Additionally, thermogravimetric (TG) analysis was performed using a TG 209 F3 Tarsus thermogravimetric analyzer (Netzsch, Germany) under a nitrogen atmosphere, and water contact angles were measured with a DCAT21 Contact Angle Analyzer (Jin Mao, China).

### **S2 Examination of PDA-ADE@KCP glycopeptide enrichment selectivity and sensitivity.**

The selectivity of PDA-ADE@KCP was assessed by enriching IgG/BSA mixtures containing 10  $\mu\text{g}$  IgG and BSA ratios of 1:10, 1:100, 1:1000 or 1:5000 with 500  $\mu\text{g}$  of PDA-ADE@KCP in 90% ACN and 1% TFA loading buffer. The mixture was incubated with shaking for 30 minutes at 37°C, then centrifuged. The resulting pellets were washed thrice with loading buffer before being eluted with 20  $\mu\text{L}$  elution buffer (20%, 0.1% TFA) with shaking for 30 minutes at 37°C. The glycopeptide eluates were then analyzed using MALDI-TOF MS. To determine the sensitivity of PDA-ADE@KCP, IgG digest concentrations of 100 f mol/ $\mu\text{L}$ , 10 f mol/ $\mu\text{L}$ , 1 f mol/ $\mu\text{L}$ , and 0.1 f mol/ $\mu\text{L}$  were enriched using 500  $\mu\text{g}$  of PDA-ADE@KCP and analyzed via MALDI-TOF MS. The selectivity and sensitivity of PDA-ADE@KCP were assessed by comparing the number and relative intensity of glycopeptide peaks.

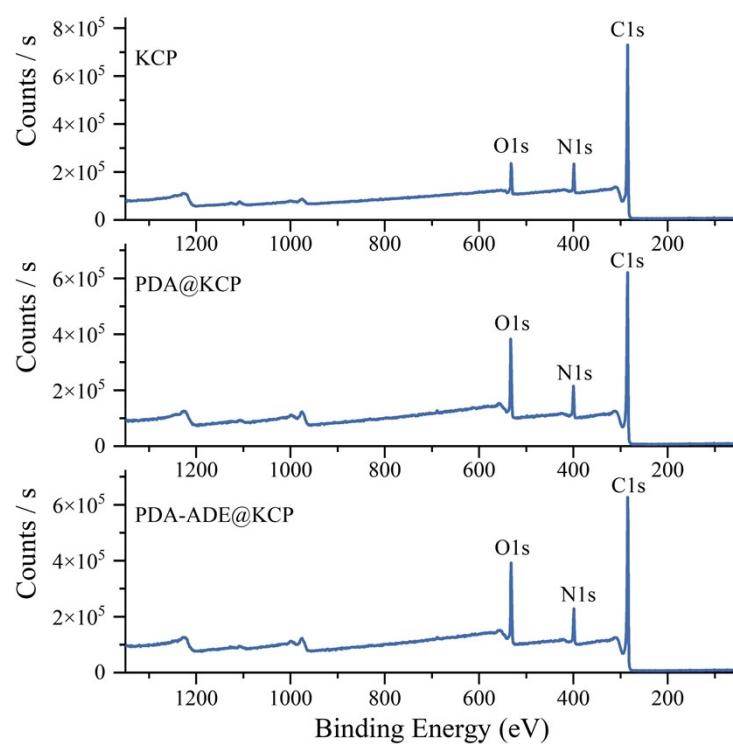

**Fig. S1.** XPS wide-scan spectra of KCP, PDA@KCP and PDA-ADE@KCP.

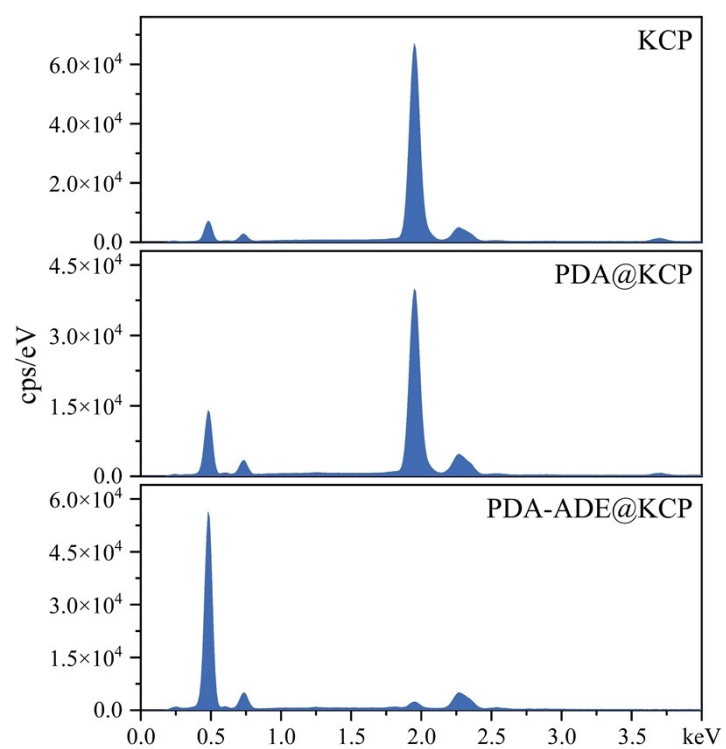

**Fig. S2.** EDS spectra of KCP, PDA@KCP and PDA-ADE@KCP.

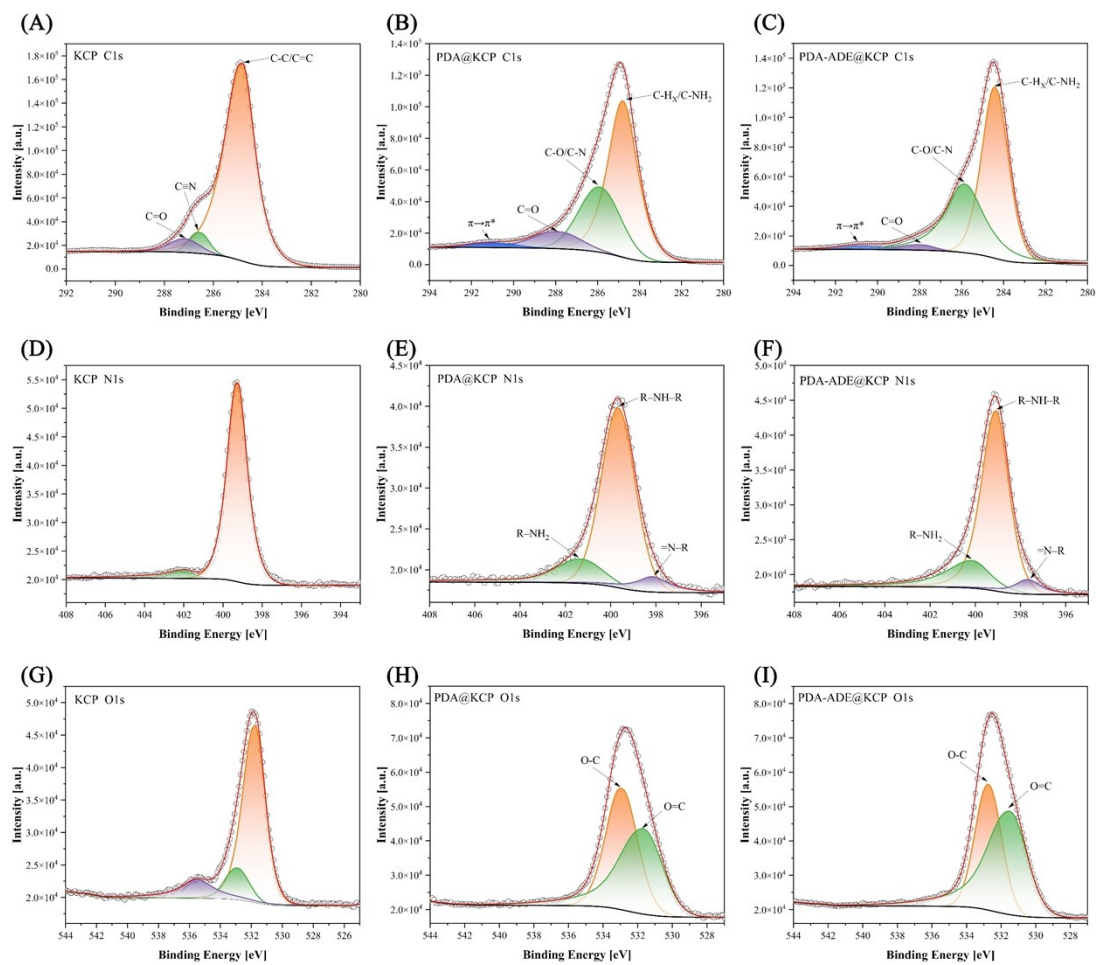

**Fig. S3.** The narrow-scan XPS spectra of KCP, PDA@KCP and PDA-ADE@KCP.

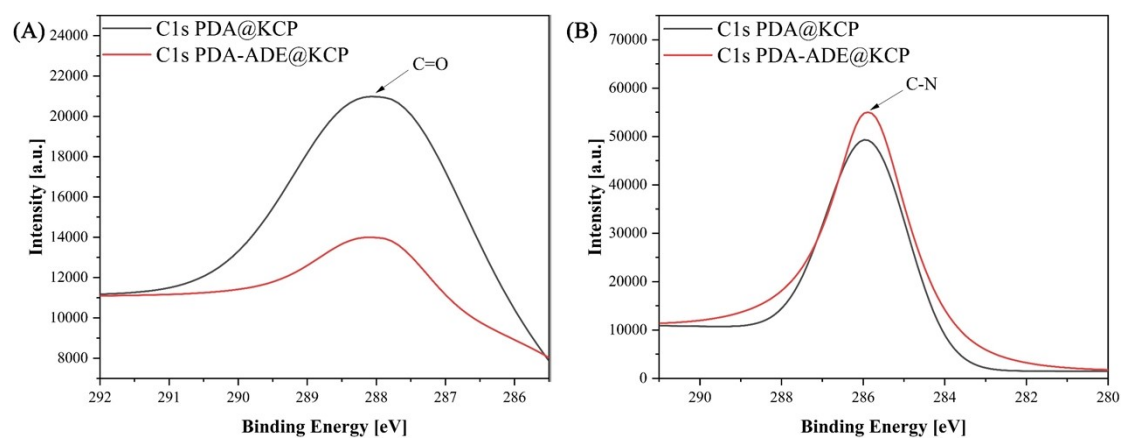

**Fig. S4.** Comparison of the peak intensities associated with (A) C=O and (B) C-N in the C1s spectra.

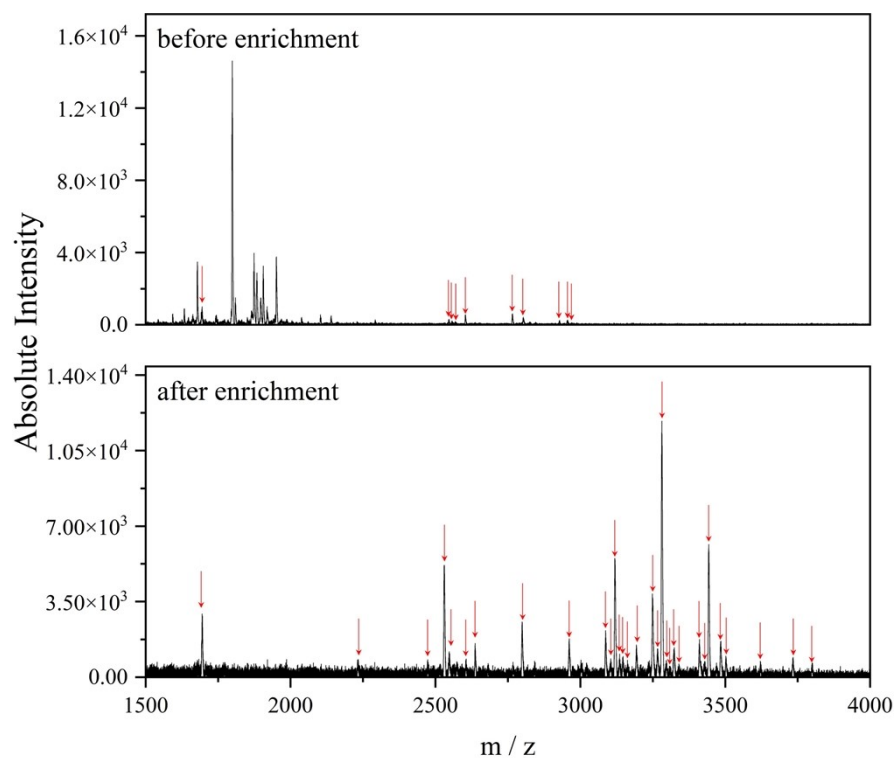

**Fig. S5.** PDA-ADE@KCP glycopeptide enrichment performance with standard glycoproteins. MALDI-TOF MS spectra of IgG tryptic digests. (A) before enrichment, (B) after enrichment.

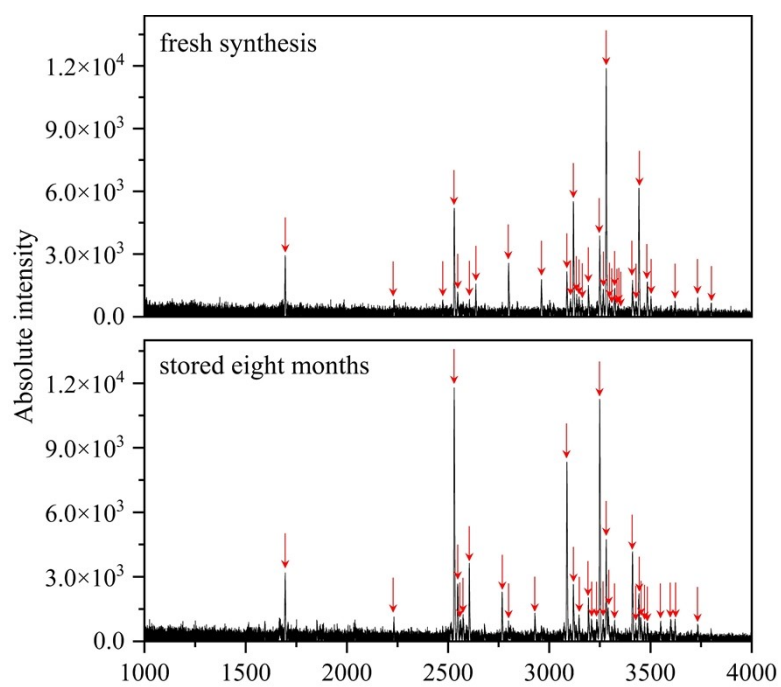

**Fig. S6.** PDA-ADE@KCP storage stability. MALDI-TOF MS spectra of IgG tryptic digests. (A) fresh synthesis, (B) stored eight months.

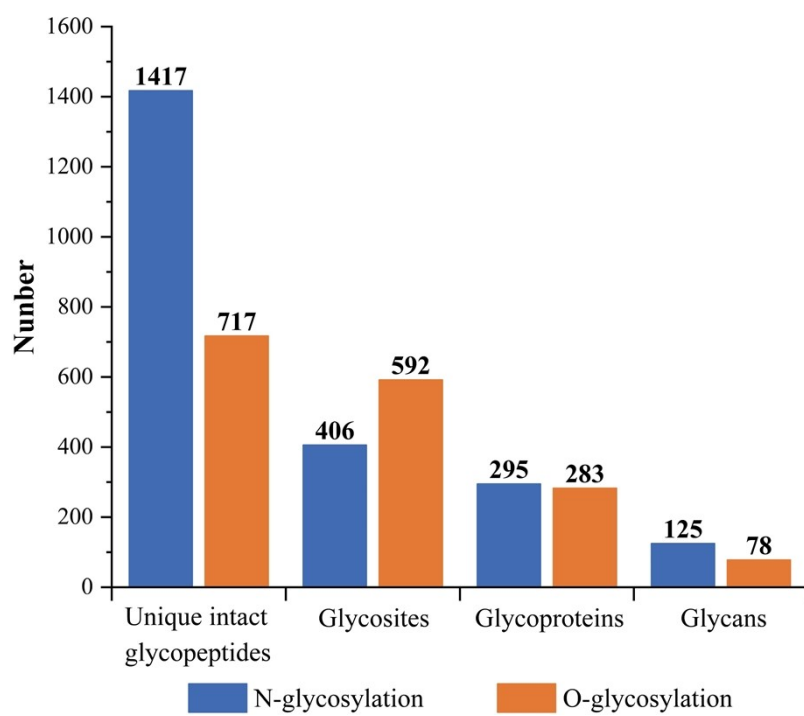

**Fig. S7.** The number of identified N- and O-glycoproteins, glycosites, intact glycopeptides and glycans using commercial ZIC-HILIC.

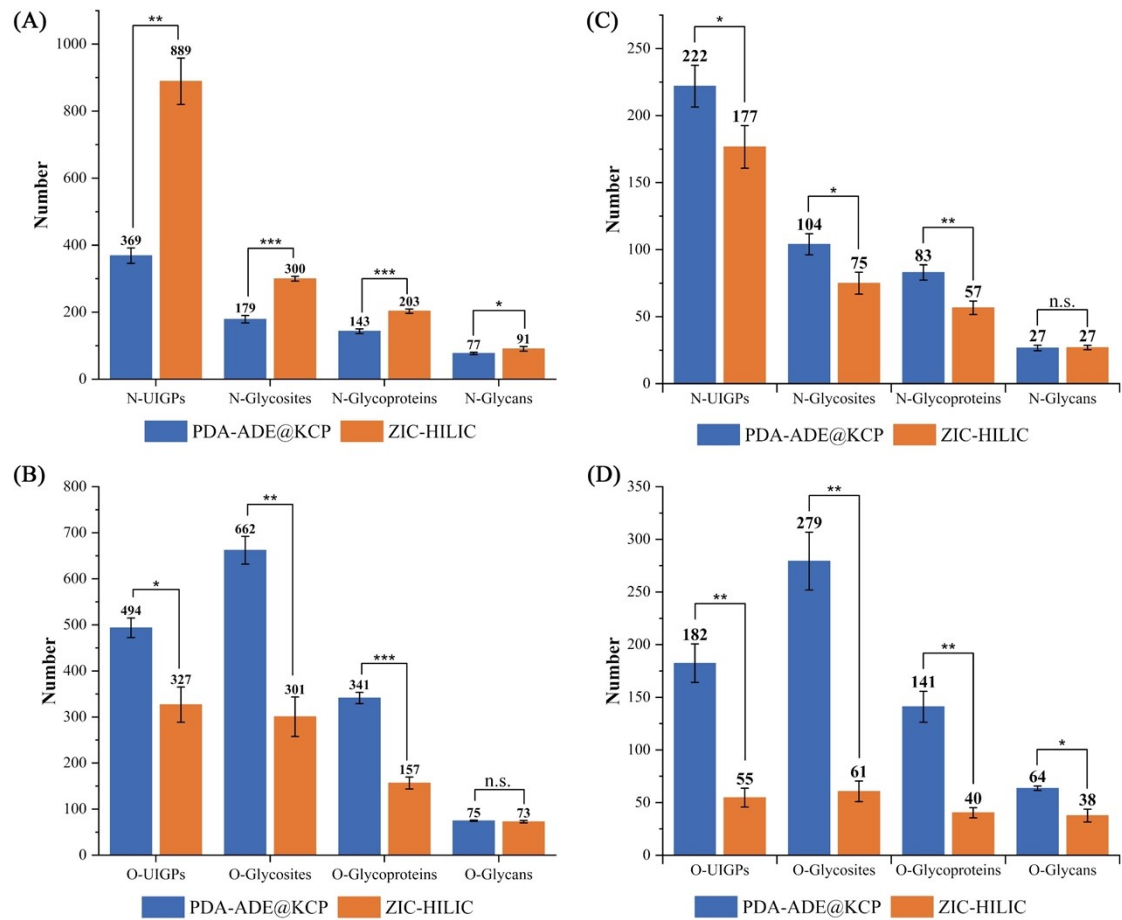

**Fig. S8.** The number of identified N- and O- linked intact glycopeptides, glycosites, glycoproteins compared between PDA-ADE@KCP and ZIC-HILIC from mouse liver. N-glycosylation (A) and O-glycosylation (B) modification with PEP 2D < 0.01, FDR 2D < 0.01 and |Log Prob| ≥ 2 as cut off. N-glycosylation (C) and O-glycosylation (D) modification with Byonic Score > 500 as cut off. “\*” means  $p < 0.05$ , “\*\*” means  $p < 0.01$ , “\*\*\*” means  $p < 0.001$  and “n.s.” means not statistically significant.

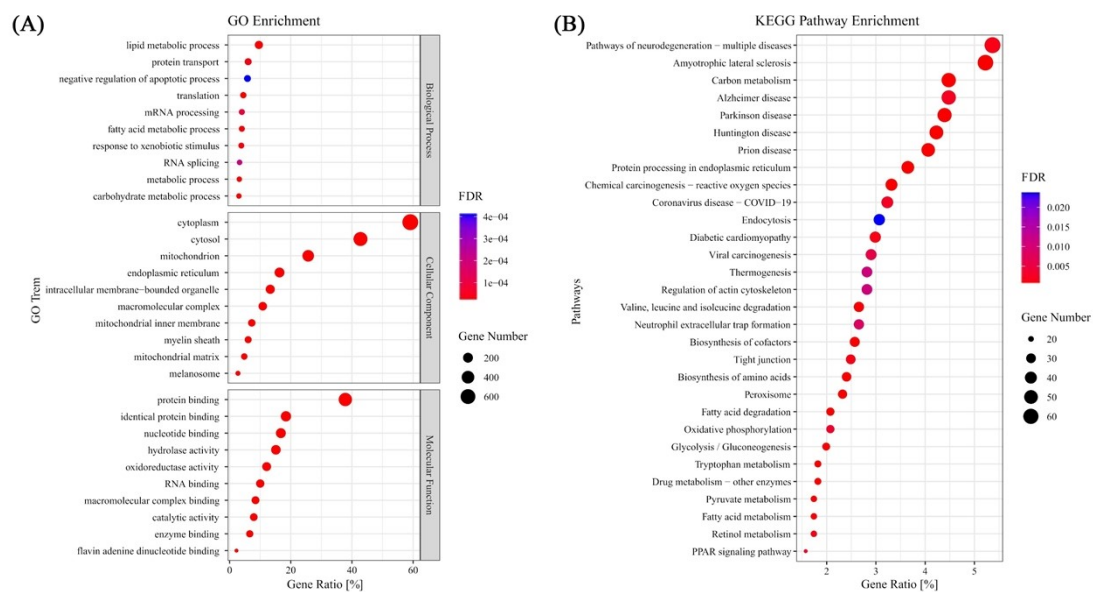

**Fig. S9.** Functional annotation analysis of global O-glycoproteins in mouse liver. (A) GO enrichment analysis; (B) KEGG enrichment analysis.

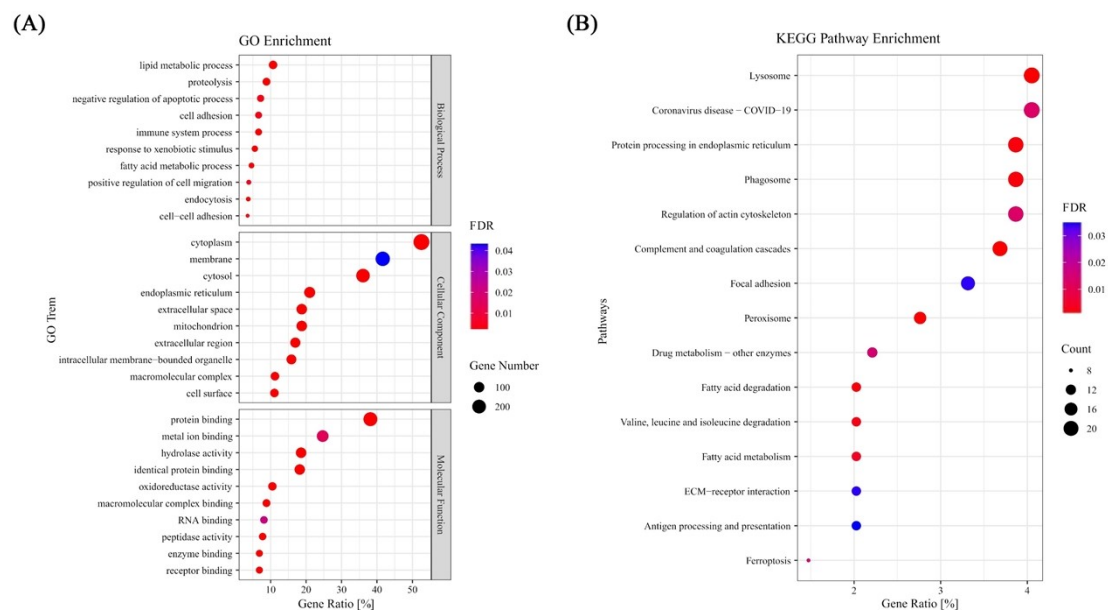

**Fig. S10.** Functional annotation analysis of global N-glycoproteins in mouse liver. (A) GO enrichment analysis; (B) KEGG enrichment analysis.

**Table S1.** Chemical compositions (by XPS) of KCP, PDA@KCP and PDA-ADE@KCP.

| Samples     | C (at. %) | N (at. %) | O (at. %) |
|-------------|-----------|-----------|-----------|
| KCP         | 70.02     | 11.78     | 18.19     |
| PDA@KCP     | 58.24     | 9.12      | 32.64     |
| PDA-ADE@KCP | 58.82     | 10.24     | 30.94     |
